# Supplementary material for: Synthesis and self-assembly of a mikto-arm star dual drug amphiphile containing both paclitaxel and camptothecin
Source: Royal Society of Chemistry journal article supplement (doi:10.1039/c4tb01084a), 2014-08-29
Supplement: c4tb01084a1.pdf [file c4tb01084a1.pdf]

**Electronic Supporting Information for:**

## **Synthesis and Self-Assembly of a Mikto-Arm Star Dual Drug Amphiphile Containing both Paclitaxel and Camptothecin**

Andrew G. Cheetham<sup>†,‡</sup>, Pengcheng Zhang<sup>†</sup>, Yi-an Lin<sup>†,‡</sup>, Ran Lin<sup>†</sup>, and Honggang Cui<sup>\*,†,‡</sup>

<sup>†</sup>Department of Chemical and Biomolecular Engineering, and <sup>‡</sup>Institute for NanoBioTechnology (INBT), Johns Hopkins University, Baltimore, Maryland 21218, USA

Email: hcui6@jhu.edu

## Table of Contents

|                                                                                             |     |
|---------------------------------------------------------------------------------------------|-----|
| S1. Synthesis of the Dual Drug Amphiphiles .....                                            | S3  |
| S1.1 Chemical & technical abbreviations .....                                               | S3  |
| S1.2 Materials and methods .....                                                            | S3  |
| S1.3 Characterization of the dual drug amphiphiles .....                                    | S4  |
| S1.4 Drug loading calculations .....                                                        | S6  |
| S1.5 Drug amphiphile concentration assay .....                                              | S6  |
| S1.6 Reactivity of <b>CPT-Cys-Sup35</b> and <b>PTX-Cys-Sup35</b> .....                      | S7  |
| S2. Self-Assembly Characterization .....                                                    | S9  |
| S2.1 Effect of dilution into PBS on <b>CPT-PTX-Sup35</b> assembly.....                      | S9  |
| S2.2 Cryo-TEM images of <b>dCPT-Sup35</b> .....                                             | S9  |
| S2.3 Nanostructure Stability .....                                                          | S10 |
| S2.3.1 CD study on the effect of dilution on nanostructure stability .....                  | S10 |
| S2.3.2 Critical aggregation concentration (CAC) determination of <b>CPT-PTX-Sup35</b> ..... | S10 |
| S2.3.3 Hydrolytic stability of the assembled structures.....                                | S11 |
| S3. Drug Release HPLC Protocol.....                                                         | S12 |
| S4 Cytotoxicity .....                                                                       | S13 |
| S4.1 Full cytotoxicity protocol.....                                                        | S13 |
| S4.2 Cytotoxicity results .....                                                             | S13 |
| S4.3 <b>dCys-Sup35</b> cytotoxicity .....                                                   | S14 |

# S1. Synthesis of the Dual Drug Amphiphiles

## S1.1 Chemical & technical abbreviations

**CPT** - camptothecin

**DA** – drug amphiphile

**DMSO** – dimethylsulfoxide

**Fmoc** - fluorenylmethyloxycarbonyl

**HATU** – *O*-(7-azabenzotriazol-1-yl)-*N,N,N',N'*-tetramethyluronium hexafluorophosphate

**HBTU** – *O*-(benzotriazol-1-yl)-*N,N,N',N'*-tetramethyluronium hexafluorophosphate

**MALDI-ToF** – matrix-assisted laser desorption/ionization time-of-flight

**MeCN** – acetonitrile

**MS** – mass spectrometry

**PBS** – phosphate-buffered saline

**PTX** – paclitaxel

**RP-HPLC** – reverse-phase high performance liquid chromatography

**TCEP** – tris(carboxyethyl)phosphine

**TFA** – trifluoroacetic acid

## S1.2 Materials and methods

Fmoc amino acids and coupling reagents (HBTU or HATU) were purchased from Advanced Automated Peptide Protein Technologies (AAPPTEC, Louisville, KY, USA), with the exception of Fmoc-Lys(Fmoc)-OH which was obtained from Novabiochem (San Diego, CA, USA). Rink Amide MBHA resin was purchased from Novabiochem (San Diego, CA, USA). Camptothecin and paclitaxel were purchased from AvaChem Scientific (San Antonio, TX, USA) and all other reagents were sourced from Sigma-Aldrich (St. Louis, MO) or VWR (Radnor, PA, USA), unless otherwise stated.

RP-HPLC was performed on a Varian ProStar Model 325 HPLC (Agilent Technologies, Santa Clara, CA, USA) equipped with a fraction collector. Preparative separations utilized a Varian PLRP-S column (100 Å, 10 µm, 150 × 25 mm), whilst analytical HPLC used a Varian Pursuit XRs C18 column (5 µm, 150 × 4.6 mm). Water and acetonitrile containing 0.1% v/v TFA were used as the mobile phase. Purified molecules were lyophilized on a FreeZone –105°C 4.5 L freeze dryer (Labconco, Kansas City, MO, USA). MALDI-ToF mass spectrometric data was acquired on an Autoflex III Smartbeam (Bruker, Billerica, MA, USA) using  $\alpha$ -cyano-4-hydroxycinnamic acid as the matrix.

### S1.3 Characterization of the dual drug amphiphiles

**dCPT-Sup35:** the lyophilized powder was dissolved in 3 mL H<sub>2</sub>O. Calibration based on the CPT absorbance gave a conjugate concentration of 448  $\mu$ M. Yield = 3.2 mg, 10%. MS (MALDI-ToF): 2407.293 [M+H]<sup>+</sup>; MS (ESI): 1204.2 [M+2H]<sup>2+</sup>, 1215.3 [M+H+Na]<sup>2+</sup>, 1226.3 [M+2Na]<sup>2+</sup>;

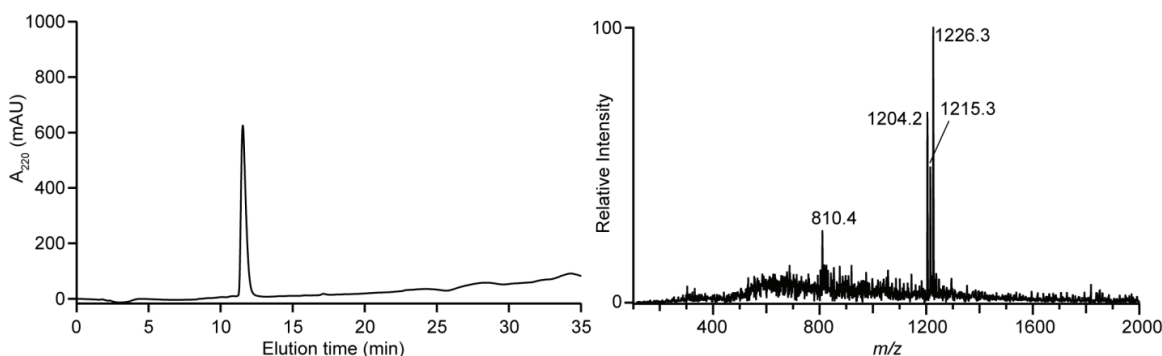

**Fig. S1** HPLC chromatogram (left) and ESI-MS spectrum (right) of purified **dCPT-Sup35**.

**CPT-PTX-Sup35:** the lyophilized powder was dissolved in 6 mL of 1:1 MeCN/H<sub>2</sub>O. Calibration based on the CPT absorbance gave a conjugate concentration of 400  $\mu$ M. Yield = 7.0 mg, 17%. MS (MALDI-ToF): 2912.822 [M+H]<sup>+</sup>; MS (ESI): 1457.0 [M+2H]<sup>2+</sup>, 1468.4 [M+H+Na]<sup>2+</sup>, 1478.9 [M+2Na]<sup>2+</sup>.

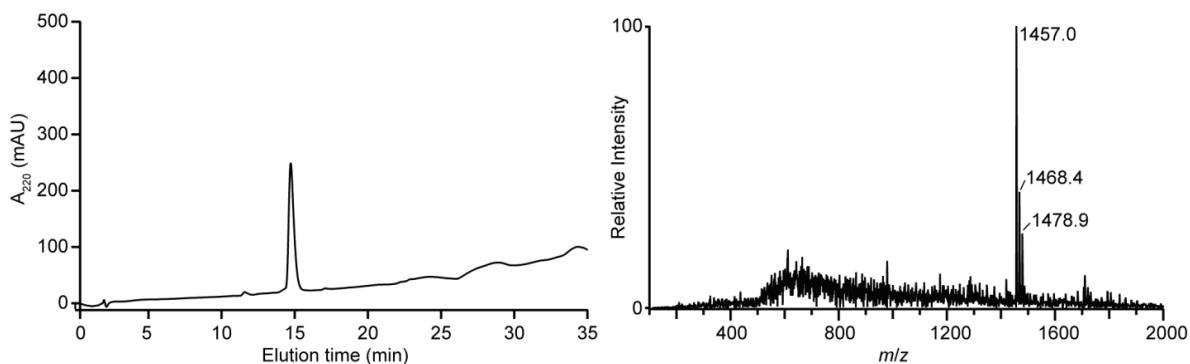

**Fig. S2** HPLC chromatogram (left) and ESI-MS spectrum (right) of purified **CPT-PTX-Sup35**.

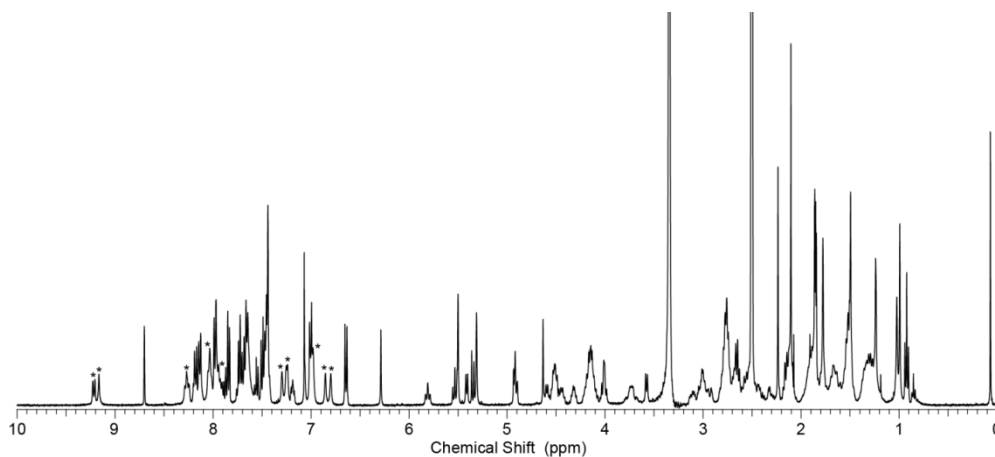

**Fig. S3**  $^1\text{H}$  NMR ( $\text{D}_6\text{-DMSO}$ , 400 MHz) of **CPT-PTX-Sup35** (exchangeable amide protons as determined by the addition of a small amount of  $\text{D}_2\text{O}$  are indicated by \*).

**dPTX-Sup35**: the lyophilized powder was dissolved in 3 mL of 1:2 MeCN/ $\text{H}_2\text{O}$ . Calibration based on the PTX absorbance gave a conjugate concentration of 204  $\mu\text{M}$ . Yield = 2.1 mg, 4%. MS (MALDI-Tof): 3418.988  $[\text{M}+\text{H}]^+$ .

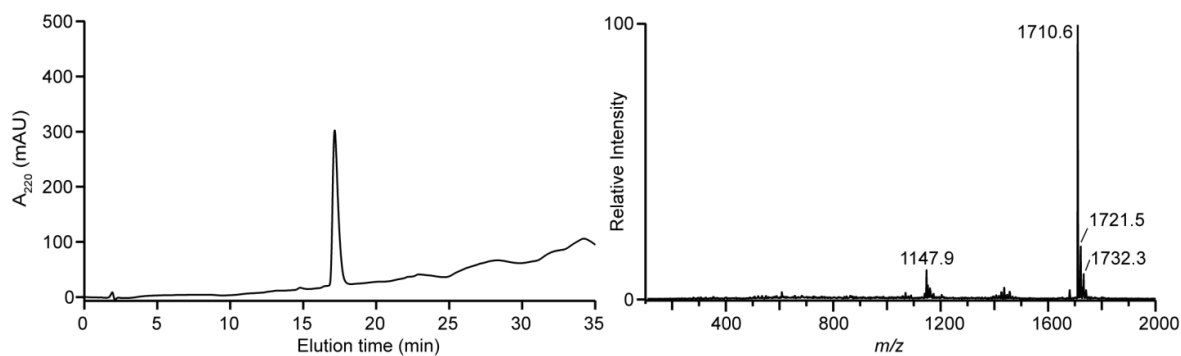

**Fig. S4** HPLC chromatogram (left) and ESI-MS spectrum (right) of purified **dPTX-Sup35**.

## S1.4 Drug loading calculations

The drug loading of the drug amphiphiles is given as the drug weight as a percentage of the total molecular weight:

$$\text{Drug loading (\%)} = \frac{M_{\text{Drug}}}{M_{\text{DA}}} \times 100$$

where  $M_{\text{Drug}}$  is the exact mass of the drug (CPT or PTX) and  $M_{\text{DA}}$  is the exact mass of the drug amphiphile

$$\text{CPT-PTX-Sup35 CPT drug loading (\%)} = \frac{1 \times 347.1}{2911.1} \times 100 = 12\%$$

$$\text{CPT-PTX-Sup35 PTX drug loading (\%)} = \frac{852.3}{2911.1} \times 100 = 29\%$$

$$\text{Total drug loading (\%)} = 12 + 29 = 41\%$$

## S1.5 Drug amphiphile concentration assay

To determine the CPT concentration of the purified drug amphiphiles, a TCEP reduction assay was developed. Briefly, 25 ml of an aqueous acetonitrile solution (1:1 H<sub>2</sub>O/MeCN) of the conjugate with an approximate concentration in the range 5 to 500  $\mu\text{M}$  was treated with 25 ml of a freshly prepared 1 M aqueous TCEP solution and allowed to stand at least 1 h with periodic vortexing. 30  $\mu\text{L}$  of this sample were then mixed with 20  $\mu\text{L}$  of DMSO and analyzed by RP-HPLC, measuring the area of the peak due to **CPT-buSH**. The CPT concentration of the analyzed solution in  $\mu\text{M}$  was determined using a calibration curve of TCEP-reduced **CPT-buSS-Pyr**). The conjugate concentration of the original solution was calculated based on the applied dilutions and number of CPT molecules the conjugate possesses.

## S1.6 Reactivity of CPT-Cys-Sup35 and PTX-Cys-Sup35

To demonstrate that the conjugates were isolated as free and reactive thiols, they were tested for their ability to undergo disulfide exchange, both with themselves (Fig. S5) and with other reactive species (Fig. S5). **CPT-Cys-Sup35** was initially dissolved in water and immediately analyzed by HPLC, showing that the dominant species was still the isolated product (black trace in Fig. S5). After 1 h, the formation of **dCPT-Sup35** and **CPT-buSH** could be seen (blue trace in Fig. S5), indicating that the conjugate's free thiol was acting as a nucleophile toward **CPT-Cys-Sup35**. Diluting a portion of the solution into PBS, it was clear that the higher pH enabled the thiol to become more active as the extent of reaction was more pronounced (red trace in Fig. S5), giving the disulfide, **(CPT-buS)<sub>2</sub>** as the dominant species. These observations are as expected given thiols become more reactive at higher pH, with the aqueous and PBS solutions having pH values of ~5 and 7.4, respectively.

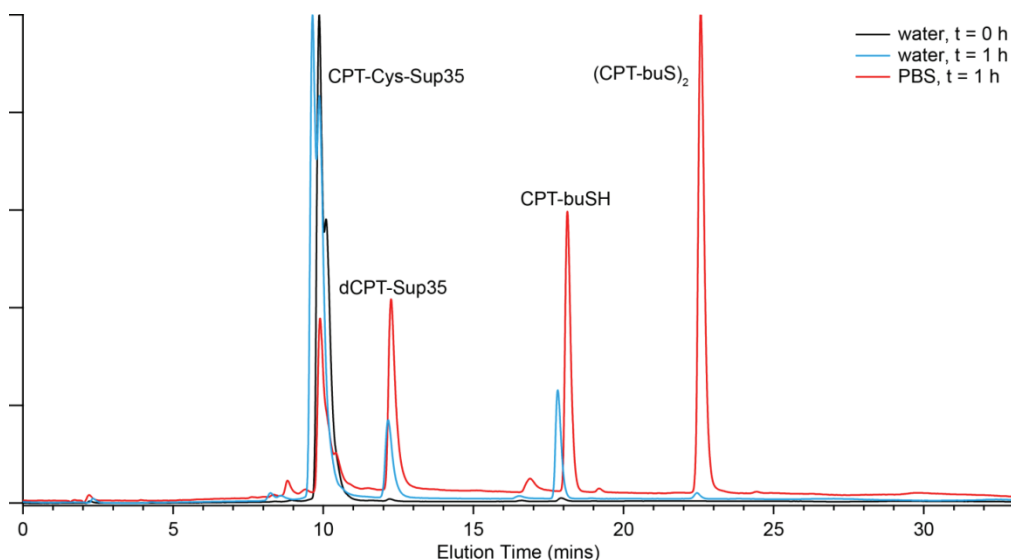

**Fig. S5** HPLC analysis of an aqueous solution of **CPT-Cys-Sup35** upon initial dissolution (black) and after 1 h (blue). The aqueous solution was also diluted two times into PBS and monitored after 1 h. Both solutions shows that the **CPT-Cys-Sup35** will scramble to give **dCPT-Sup35**, **CPT-buSH** and **(CPT-buS)<sub>2</sub>**, with the speed of reaction determined by the solution pH (~5 for water and 7.4 for PBS). Chromatograms are normalized with respect to the most intense signal.

A DMSO solution of **PTX-Cys-Sup35** was allowed to react with the activated disulfide, **CPT-buSS-Pyr**, giving the hetero-DDA, **CPT-PTX-Sup35**, as the major product (Fig. S6). This and the previous

experiment both illustrate the potential usefulness of a singly reacted di-thiol containing species, as it can be isolated and then used as a reagent to form other dual drug amphiphiles as desired.

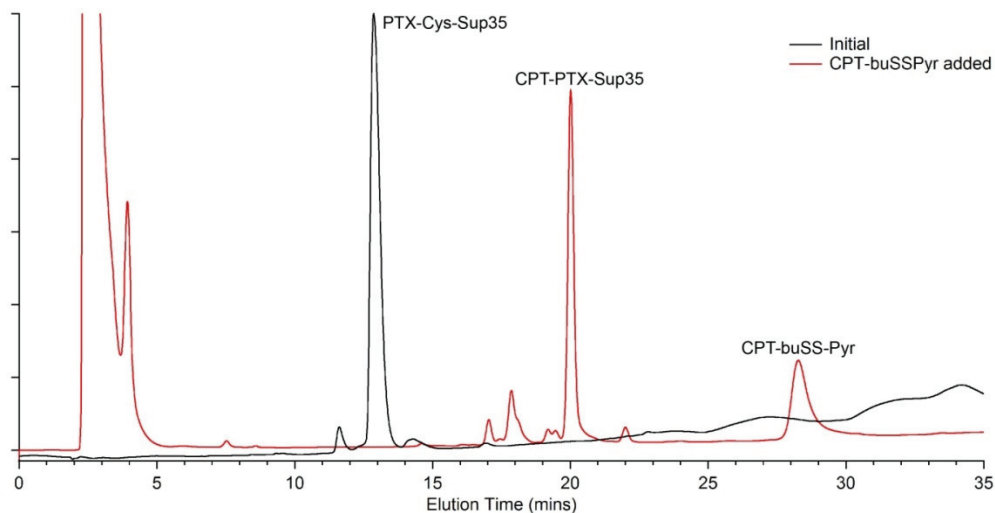

**Fig. S6** HPLC analysis of a DMSO solution of **PTX-Cys-Sup35** to which was added **CPT-buSS-Pyr**, indicating that the conjugate remains active towards directed disulfide exchange and allows formation of the **CPT-PTX-Sup35** dual drug amphiphile. This suggests that the singly reacted species can be isolated and used as a reagent in its own right for the reaction with other activated drug molecules.



## S2. Self-Assembly Characterization

### S2.1 Effect of dilution into PBS on CPT-PTX-Sup35 assembly

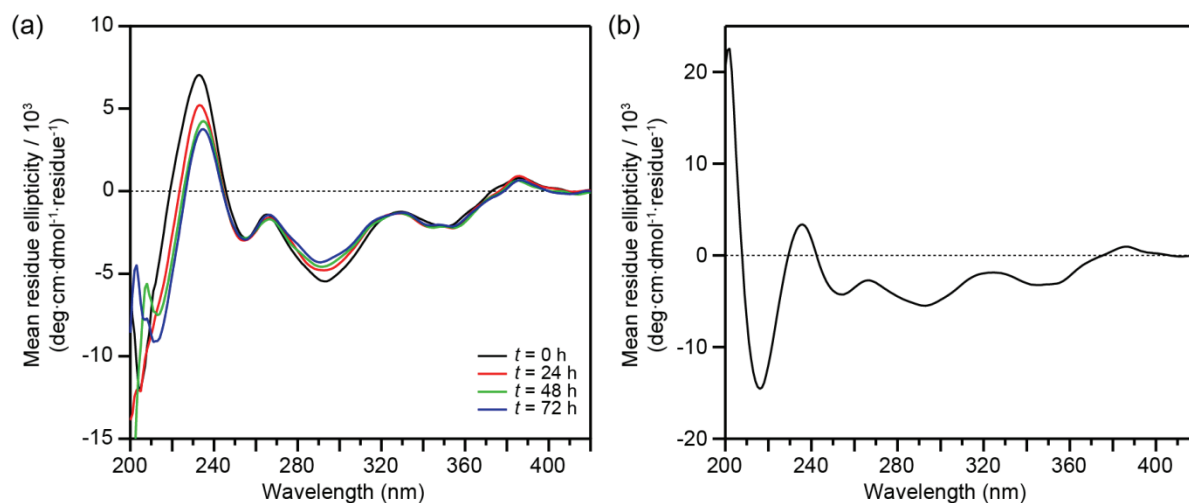

**Fig. S7** Effect of dilution into PBS on the self-assembly of **CPT-PTX-Sup35**. (a) Time course study of a  $100 \mu\text{M}$  sample in PBS prepared from a  $1 \text{ mM}$  solution in water that had been aged for 2 h, showing the slow evolution of the  $\beta$ -sheet signal. (b) The CD spectra of a  $100 \mu\text{M}$  sample in PBS prepared from a  $1 \text{ mM}$  solution in water that had been aged for 8 d, indicating that dilution into PBS does not disrupt the matured nanostructure.

### S2.2 Cryo-TEM images of dCPT-Sup35

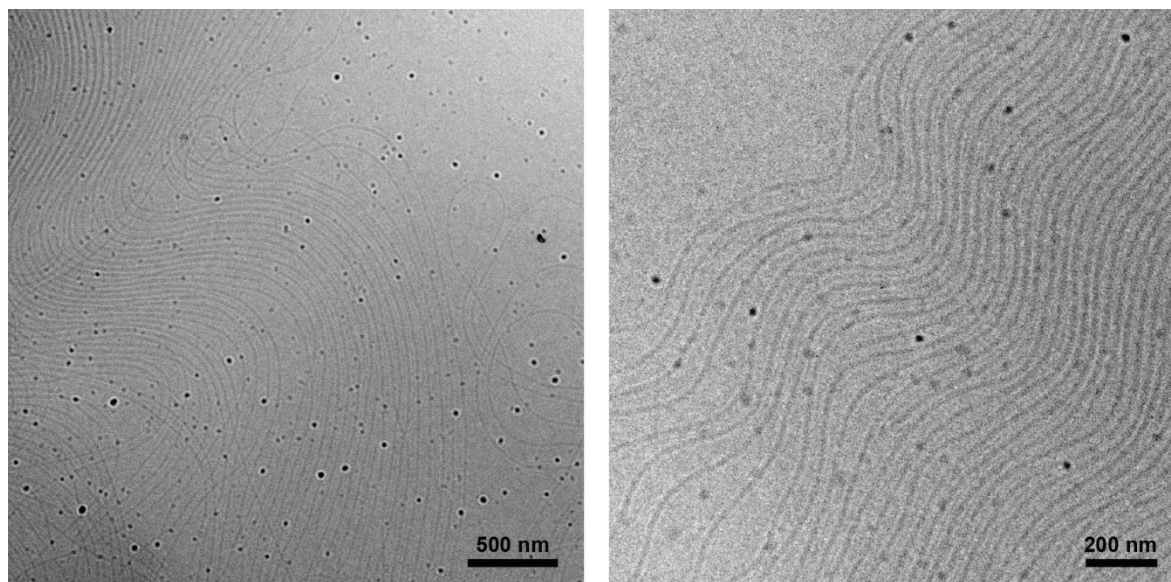

**Fig. S8** Representative cryo-TEM images of a  $500 \mu\text{M}$  aqueous solution of **dCPT-Sup35**. The dark spheres are caused by ice crystals in the vitreous ice film and were formed during sample preparation.

## S2.3 Nanostructure Stability

### S2.3.1 CD study on the effect of dilution on nanostructure stability

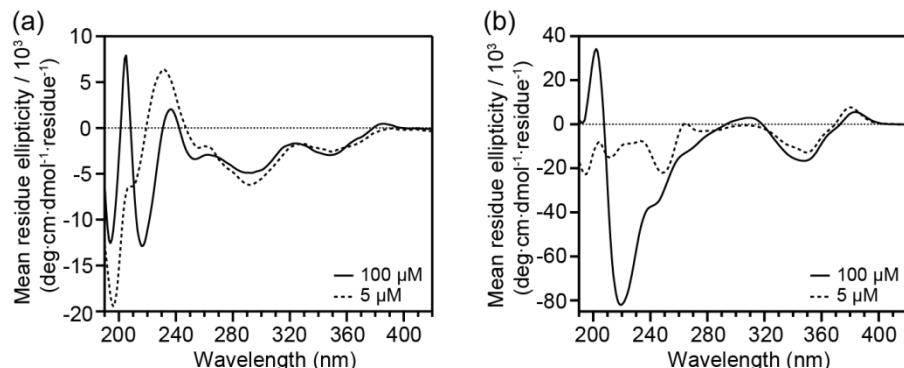

**Fig. S9** Circular dichroism spectra of 100  $\mu\text{M}$  (aged overnight, filled line) and 5  $\mu\text{M}$  (recorded after dilution of the 100  $\mu\text{M}$  sample, dotted line) solutions of **CPT-PTX-Sup35** (a) and **dCPT-Sup35** (b)..

### S2.3.2 Critical aggregation concentration (CAC) determination of CPT-PTX-Sup35

The CAC values for **CPT-PTX-Sup35** and **dCPT-Sup35** were determined using a Nile Red encapsulation method. Briefly, from a 1 mM stock of **CPT-PTX-Sup35** or **dCPT-Sup35** in water that had been aged for at least 2 days, a series of dilutions in pure water were prepared, ranging from 0.5 nM to 200  $\mu\text{M}$ . To 250  $\mu\text{L}$  of each solution, was added 2.5 mL of a 1 mM solution of Nile Red in acetone. The acetone was then allowed to evaporate and the solution was equilibrated overnight. The fluorescence spectrum of each solution was recorded using a Fluorolog spectrofluorometer (Horiba Jobin Yvon Inc., Edison, NJ), exciting at 550 nm and collecting the emission intensity between 580 and 720 nm. To obtain the CAC value, the data from the 640 emission was plotted against the concentration on a log scale, with the value given by the intersection of the two linear segments (Fig. S10). The experiment was repeated to verify the trend.

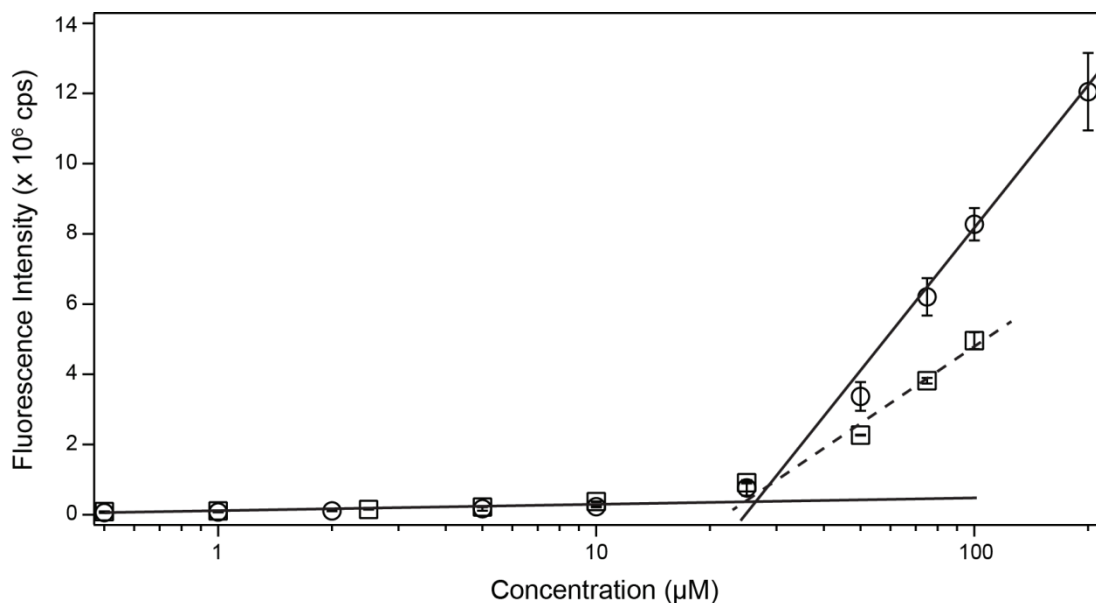

**Fig. S10** Critical aggregation concentration (CAC) determination of CPT-PTX-Sup35 (○) and dCPT-Sup35 (□) using a Nile red fluorescence method. Data are given as mean  $\pm$  s.d. ( $n = 2$ ).

### S2.3.3 Hydrolytic stability of the assembled structures

The hydrolytic stability of the assembled DAs was determined by analysis of 100  $\mu$ M and 1 mM solutions after 2 weeks of aging at room temperature.

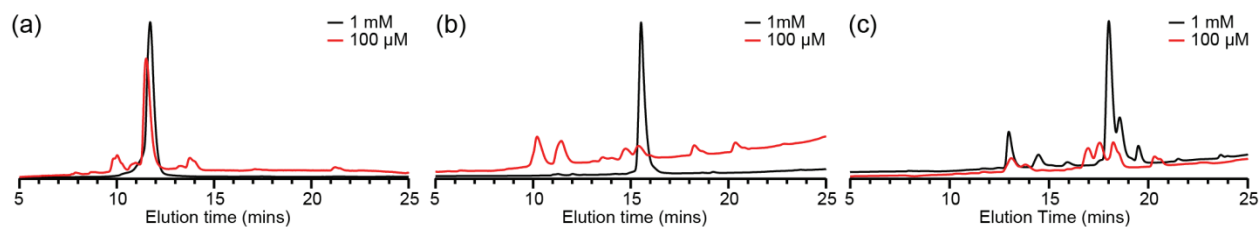

**Fig. S11** Hydrolytic stability of dCPT-Sup35 (a), CPT-PTX-Sup35 (b), and dPTX-Sup35 (c) at 100  $\mu$ M (red trace) and 1 mM (black trace) in pure water after 2 weeks aging at room temperature. All solutions were monitored using a wavelength of 220 nm.

### S3. Drug Release HPLC Protocol

The degradation of CPT-PTX-Sup35 was monitored by RP-HPLC using the following conditions: 237 nm detection wavelength; 1 ml/min flow rate; mobile phase was 0.1% aqueous TFA (A) and acetonitrile containing 0.1% TFA; gradient is given in Table S1. The concentrations of **CPT-PTX-Sup35**, CPT and PTX were determined by measuring the area of the respective peaks and comparing against a calibration curve for each species.

**Table S1** HPLC gradient used for drug release study.

| <b>Time (min)</b> | <b>Mobile Phase A (%)</b> | <b>Mobile Phase B (%)</b> |
|-------------------|---------------------------|---------------------------|
| 0                 | 65                        | 35                        |
| 5                 | 65                        | 35                        |
| 18                | 13                        | 87                        |
| 21                | 13                        | 87                        |
| 22                | 65                        | 35                        |
| 25                | 65                        | 35                        |

## S4 Cytotoxicity

### S4.1 Full cytotoxicity protocol

KB-3-1 or KB-V1 were seeded onto 96-well plate ( $5 \times 10^3$  cells/well) and allowed to attach overnight. **PTX-CPT-Sup35** was diluted with fresh medium and incubated with cells immediately to achieve final conjugate concentrations. Medium containing the same concentration of PTX, CPT or **dPTX-Sup35** were also used to incubate the cells, with non-treated cells (solvent only) as the control group. After 48 h incubation, the cell viability was determined using the SRB method according to the manufacturer's protocol (TOX-6, Sigma, St. Louis, MO).

### S4.2 Cytotoxicity results

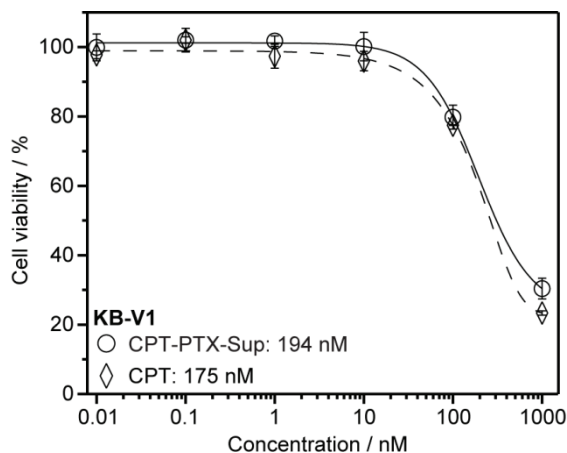

**Fig. S12** Comparison of the cytotoxicity of **CPT-PTX-Sup35** and CPT against PTX-resistant KB-V1 cervical cancer cells. Cell viability was determined by SRB assay after 48 h incubation with the appropriate drug-containing media. Calculated  $IC_{50}$  values are given in the figure legends, data are given as mean  $\pm$  s.d. ( $n = 3$ ).

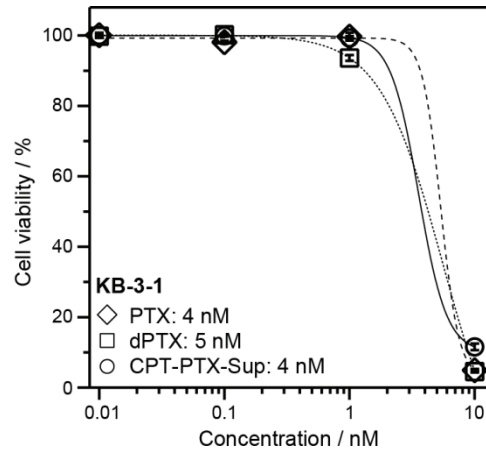

**Fig. S13** Cytotoxicity study of PTX, CPT-PTX-Sup35 and dPTX-Sup35 against PTX-sensitive KB-3-1 cervical cancer cells. Cell viability was determined by SRB assay after 48 h incubation with the appropriate drug-containing media. Calculated IC<sub>50</sub> values are given in the figure legends, data are given as mean ± s.d. (*n* = 3).

### S4.3 dCys-Sup35 cytotoxicity

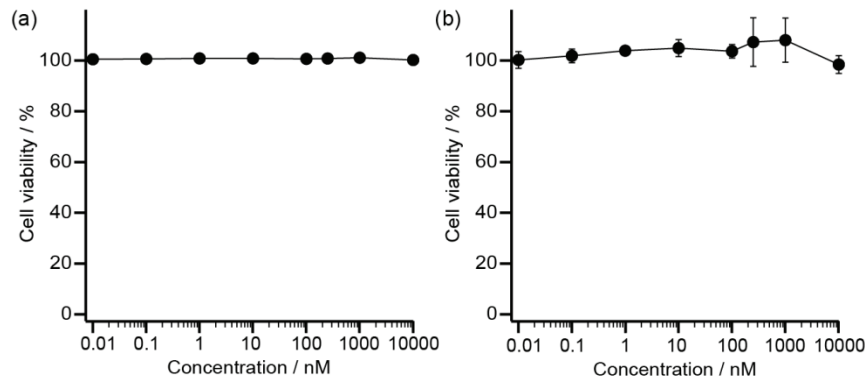

**Fig. S14** Cytotoxicity of dCys-Sup35 against KB-3-1 (a) and KB-V1 (b) cervical cancer cells. Cell viability was determined by SRB assay after 48 h incubation with the appropriate drug-containing media. Data are given as mean ± s.d. (*n* = 3).
